# Supplementary material for: Contributions of fallow lands in the Brazilian Amazon to CO2 balance, deforestation and the agrarian economy: Inequalities among competing land use trajectories
Source: Oxford University Press journal article supplement (doi:10.12952/journal.elementa.000133), 2016-01-01
Supplement: elementa_000133_s003.docx [file elementa_000133_s003.docx]

*Table S-3, Evolution of Gross Production Value in the northern region by technological trajectory (in constant R$ from 2012, corrected by IGP-FGV1).*

| Year | Peasant production systems converging to: | | | Enterprise production systems  converging to: | | | Total |
| --- | --- | --- | --- | --- | --- | --- | --- |
| Intensive  agriculture  (perennial crops  and/or dairy)  (T1) | Agro-  forestry  (T2) | Livestock  for meat  (T3) | Livestock  for meat  (T4) | Annual  crops  (soybeans and corn)  (T7) | Plantation  (perennial crops)  (T5) |
| 1990 | 6,228,866,236 | 5,128,297,347 | 3,861,458,678 | 1,990,459,161 | 564,577,701 | 1,353,960,367 | 19,127,619,491 |
| 1991 | 4,459,951,609 | 3,231,746,731 | 1,864,390,978 | 2,320,937,757 | 481,800,657 | 1,101,705,323 | 13,460,533,056 |
| 1992 | 2,890,450,122 | 2,283,252,882 | 1,811,316,268 | 2,077,923,904 | 436,713,781 | 692,664,306 | 10,192,321,262 |
| 1993 | 3,472,317,540 | 2,017,517,759 | 1,887,480,603 | 2,301,193,053 | 282,906,222 | 698,694,970 | 10,660,110,146 |
| 1994 | 2,956,329,021 | 1,919,776,842 | 1,679,488,224 | 2,395,539,645 | 294,527,774 | 498,743,820 | 9,744,405,325 |
| 1995 | 2,760,576,244 | 1,653,787,316 | 1,732,754,325 | 2,435,472,548 | 178,774,578 | 465,280,049 | 9,226,645,061 |
| 1996 | 3,781,842,313 | 2,826,745,161 | 2,195,352,193 | 2,023,013,865 | 309,341,104 | 921,587,594 | 12,057,882,231 |
| 1997 | 4,311,369,563 | 3,016,405,787 | 2,318,330,502 | 2,268,841,221 | 279,634,901 | 976,274,783 | 13,170,856,757 |
| 1998 | 4,414,670,130 | 3,311,973,821 | 2,605,335,009 | 2,411,085,871 | 728,041,625 | 841,281,023 | 14,312,387,479 |
| 1999 | 4,252,932,042 | 3,050,494,089 | 2,579,783,922 | 2,594,969,510 | 697,232,256 | 673,864,515 | 13,849,276,333 |
| 2000 | 4,192,102,815 | 2,864,315,730 | 2,567,020,116 | 3,032,191,784 | 565,911,971 | 536,786,089 | 13,758,328,504 |
| 2001 | 4,718,398,409 | 3,422,152,441 | 2,775,027,330 | 2,995,350,988 | 745,020,960 | 537,862,728 | 15,193,812,855 |
| 2002 | 7,788,826,732 | 5,020,624,906 | 2,675,630,969 | 3,095,846,642 | 717,241,315 | 742,418,437 | 20,040,589,002 |
| 2003 | 8,007,768,666 | 4,723,584,417 | 2,833,315,878 | 3,516,644,693 | 1,300,700,260 | 750,874,804 | 21,132,888,717 |
| 2004 | 7,455,625,158 | 4,518,649,965 | 2,643,220,428 | 3,940,356,393 | 1,300,388,066 | 782,832,555 | 20,641,072,566 |
| 2005 | 4,889,564,901 | 3,841,679,152 | 2,906,651,807 | 3,991,956,118 | 1,053,089,869 | 807,036,204 | 17,489,978,051 |
| 2006 | 4,680,557,377 | 4,341,134,625 | 2,920,996,532 | 3,539,925,969 | 977,579,828 | 953,727,786 | 17,413,922,116 |
| 2007 | 5,000,879,240 | 4,417,130,163 | 2,713,528,738 | 3,494,076,972 | 1,000,239,903 | 964,520,240 | 17,590,375,256 |
| 2008 | 4,954,881,505 | 4,687,832,678 | 3,475,558,865 | 4,358,581,085 | 1,524,518,899 | 983,358,531 | 19,984,731,563 |
| 2009 | 5,023,309,214 | 5,411,078,693 | 3,551,065,138 | 4,252,875,982 | 1,872,453,325 | 1,053,514,436 | 21,164,296,787 |
| 2010 | 5,745,287,369 | 5,620,152,229 | 4,110,747,503 | 4,600,927,512 | 1,897,960,287 | 1,180,953,891 | 23,156,028,792 |
| 2011 | 6,932,295,925 | 7,935,881,223 | 4,337,103,646 | 4,935,993,043 | 2,526,924,717 | 1,399,164,466 | 28,067,363,020 |

Source: IBGE, FNP, IPEADATA. 1 General Prices Index of the Getulio Vargas Fundation.
